# Supplementary material for: Transcriptional repression of GIF1 by the KIX-PPD-MYC repressor complex controls seed size in Arabidopsis
Source: PubMed Central journal article supplement (PMC7160150; doi:10.1038/s41467-020-15603-3), 2020-04-15
Supplement: 41467_2020_15603_MOESM1_ESM.pdf [file 41467_2020_15603_MOESM1_ESM.pdf]

## **Description of Additional Supplementary Files**

File Name: Supplementary Data 1

Description: Genes with significantly changed expression in both the first pair of leaves of myc3 myc4 and ppd1-2 ppd2-cr plants
