# Supplementary material for: Transcriptional repression of GIF1 by the KIX-PPD-MYC repressor complex controls seed size in Arabidopsis
Source: PubMed Central journal article supplement (PMC7160150; doi:10.1038/s41467-020-15603-3), 2020-04-15
Supplement: 41467_2020_15603_MOESM2_ESM.pdf [file 41467_2020_15603_MOESM2_ESM.pdf]

**Transcriptional repression of *GIF1* by the KIX-PPD-MYC repressor complex controls seed size in Arabidopsis**

Liu et al.

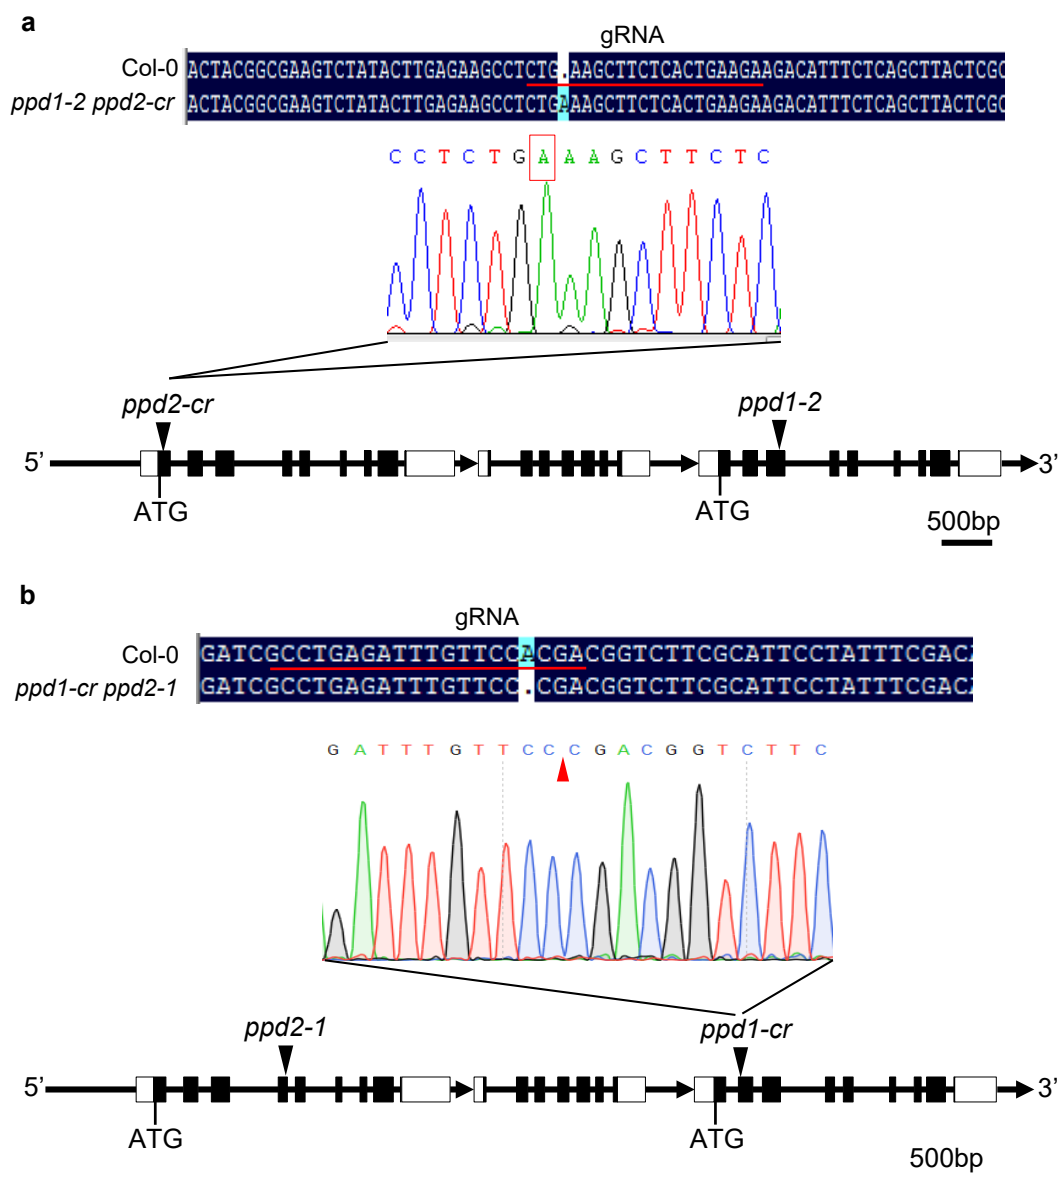

**Supplementary Fig. 1** Identification of the *ppd1-2 ppd2-cr* and *ppd1-cr ppd2-1* mutants. **a** The *ppd1-2 ppd2-cr* plants were generated by CRISPR-Cas9 mediated genome editing in the *ppd1-2* background. Alignment analysis of Col-0 and *ppd1-2 ppd2-cr* genomic DNA (top). The gRNA with red line is used for CRISPR-Cas9 mediated genome editing. Sequencing chromatogram of the genomic DNA from *ppd1-2 ppd2-cr* plants (middle). The A base with a red box represents the insertion base and causes a frameshift mutation of *PPD2*. The mutation sites of *ppd1-2* and *ppd2-cr* in the *ppd1-2 ppd2-cr* plants are showed (bottom). **b** The *ppd1-cr ppd2-1* plants were generated by CRISPR-Cas9 mediated genome editing in the *ppd2-1* background. Alignment analysis of Col-0 and *ppd1-cr ppd2-1* genomic DNA (top). The gRNA with red line is used for CRISPR-Cas9 mediated genome editing. Sequencing chromatogram of the genomic DNA from *ppd1-cr ppd2-1* plants (middle). The red arrow position represents where the missing A base should be in. The mutation sites of *ppd1-cr* and *ppd2-1* in the *ppd1-cr ppd2-1* plants are showed (bottom).

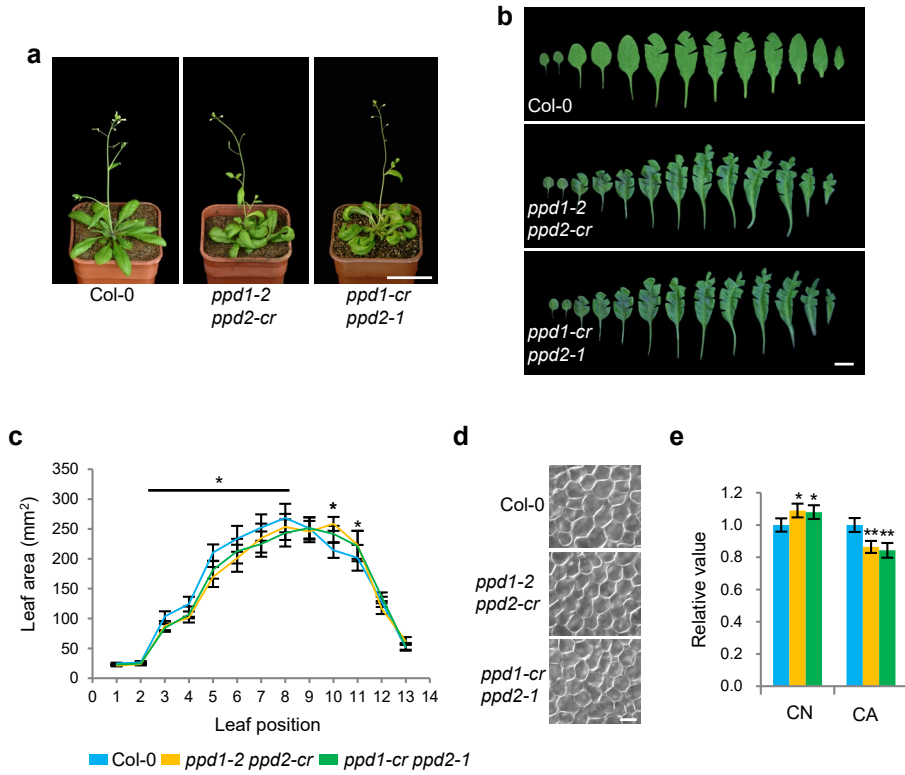

**Supplementary Fig. 2** The phenotypes of *ppd1-2 ppd2-cr* and *ppd1-cr ppd2-1* plants. **a** 32-day-old plants of Col-0, *ppd1-2 ppd2-cr*, and *ppd1-cr ppd2-1* plants. **b** Leaf series of Col-0, *ppd1-2 ppd2-cr*, and *ppd1-cr ppd2-1*. **c** Area of individual leaves from Col-0, *ppd1-2 ppd2-cr*, and *ppd1-cr* ( $n = 12$ ). **d** Palisade cells in the fifth leaf of Col-0, *ppd1-2 ppd2-cr*, and *ppd1-cr ppd2-1*. **e** The palisade cell number (CN,  $n = 8$ ) and palisade cell area (CA,  $n = 300$ ) in the fifth leaf of Col-0, *ppd1-2 ppd2-cr*, and *ppd1-cr ppd2-1*. Scale bars, 4 cm (**a**), 1 cm (**b**), and 50  $\mu\text{m}$  (**d**). Error bars represent  $\pm$ SE. \*, significant difference from the Col-0, one-way ANOVA  $P$ -values: \*  $P < 0.05$  and \*\*  $P < 0.01$ .

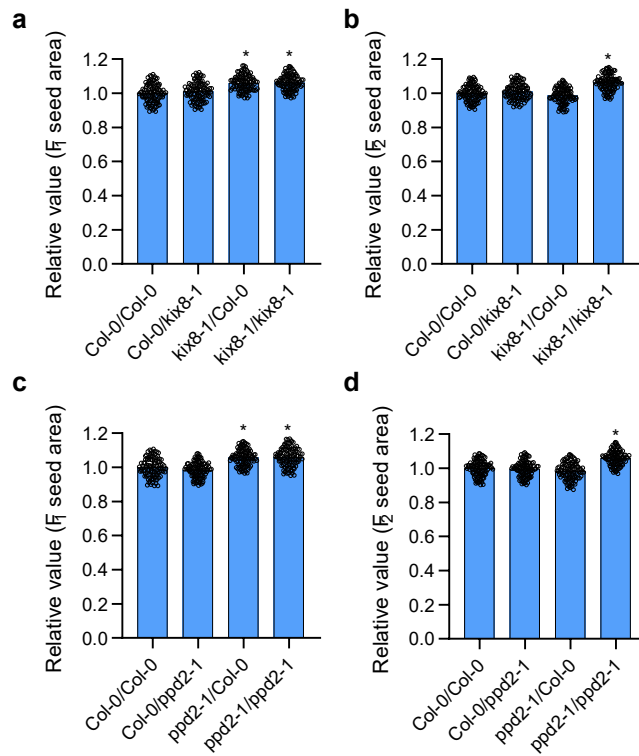

**Supplementary Fig. 3** KIX8 and PPD2 act maternally to control seed development. **a-b** The relative area of  $F_1$  seeds (**a**) and  $F_2$  seeds (**b**) from Col-0/Col-0, Col-0/*kix8-1*, *kix8-1*/Col-0, and *kix8-1*/*kix8-1* plants ( $n = 100$ ). **c-d** The relative area of  $F_1$  seeds (**c**) and  $F_2$  seeds (**d**) from Col-0/Col-0, Col-0/*ppd2-1*, *ppd2-1*/Col-0, and *ppd2-1*/*ppd2-1* plants ( $n = 100$ ). Seeds from the third to seventh siliques on the stem of six plants were used for analysis. Error bars represent  $\pm$  SE. \*, significant difference from the Col-0, one-way ANOVA  $P$ -values: \*  $P < 0.05$ .

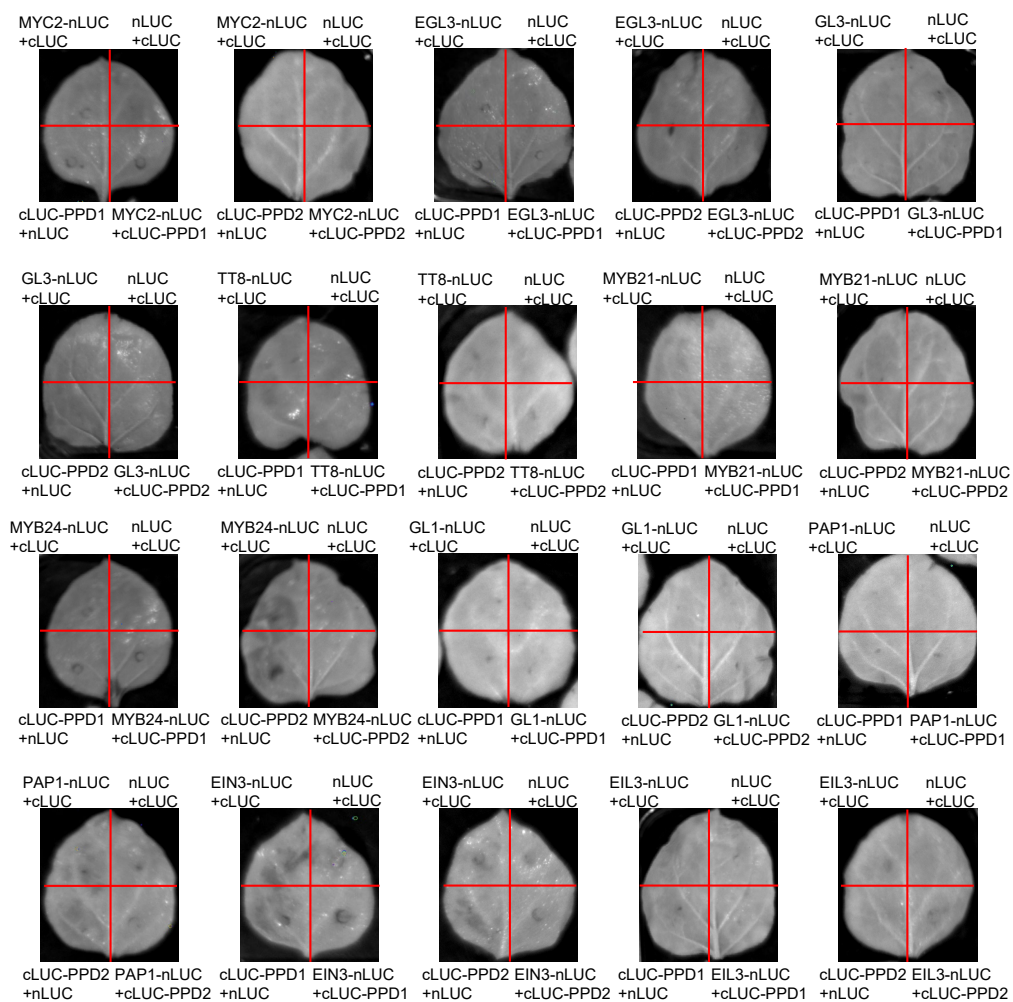

**Supplementary Fig. 4** The PPD1/2-interacting proteins finding by split luciferase complementation assays.

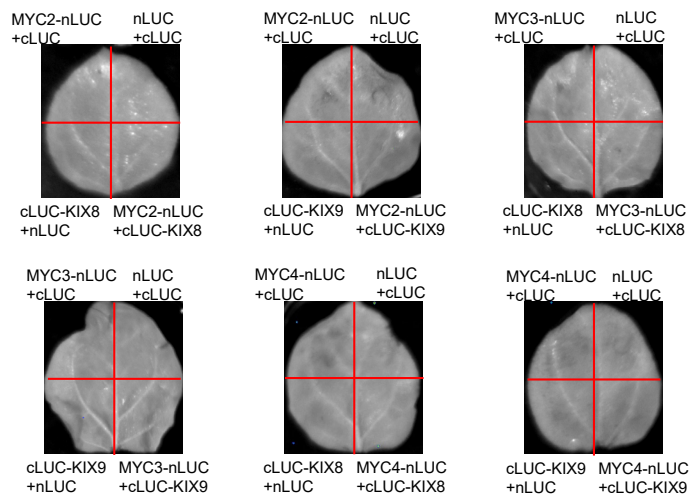

**Supplementary Fig. 5** KIX8 and KIX9 are not interact with MYC2/3/4 by split luciferase complementation assays .

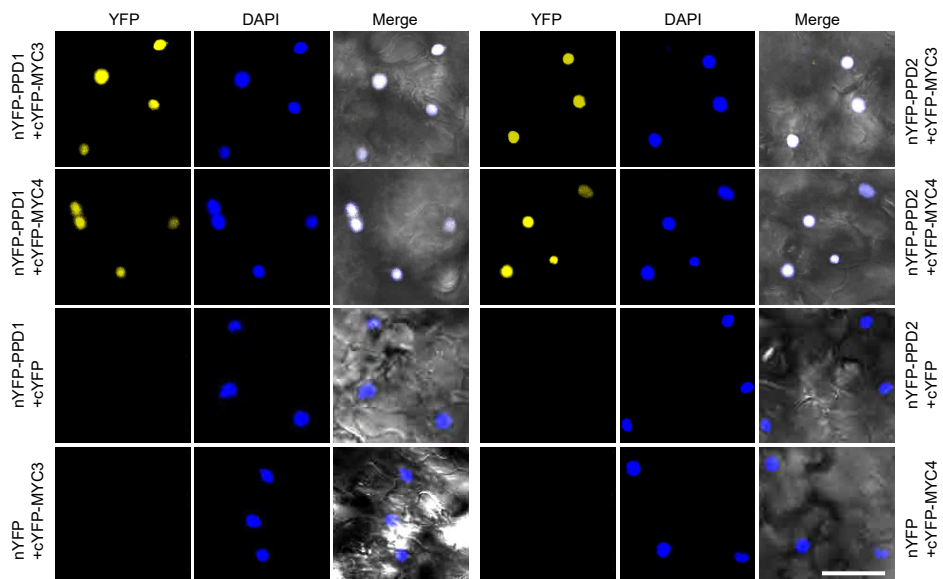

**Supplementary Fig. 6** The bimolecular fluorescence complementation assays showing that PPD1/2 interact with MYC3/4 in *N. benthamiana* leaves. YFP fluorescence was observed at 2 days later after coinfiltrating with different combinations of *nYFP-PPD1/2*, *cYFP-MYC3/4*, *nYFP*, and *cYFP* constructs. Blue dots represent the nuclei after staining with DAPI . Scale bar = 50  $\mu$ m.

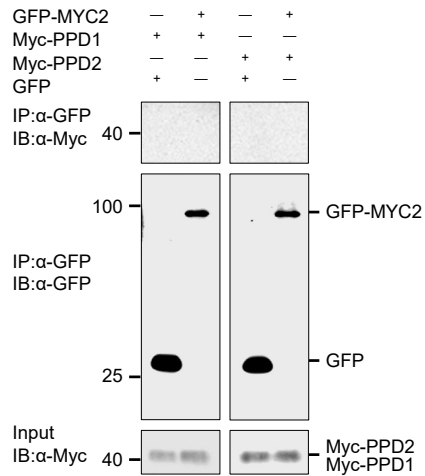

**Supplementary Fig. 7** PPD1 and PPD2 are not interact with MYC2 in Arabidopsis by co-immunoprecipitation analyses. Total protein extracts of *35S:Myc-PPD1/2;35S:GFP* and *35S:Myc-PPD1/2;35S:GFP-MYC2* plants were incubated with GFP-Trap-A agarose beads. Precipitates were detected by Western blot with anti-GFP or anti-Myc antibody.



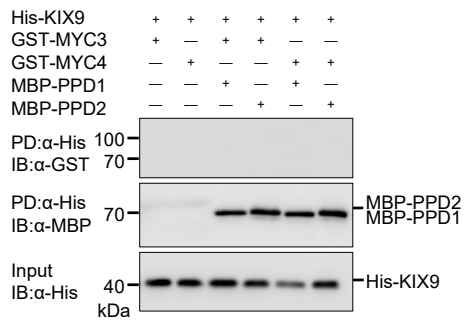

**Supplementary Fig. 8** KIX9 is not interact with MYC3/4 by pull-down analyses. His-KIX9 was incubated with GST-MYC3 or GST-MYC4 and MBP-PPD1 or MBP-PPD2. Proteins were pulled down by the Ni-NTA agarose beads and detected by Western blot with anti-GST, anti-MBP, or anti-His antibody.

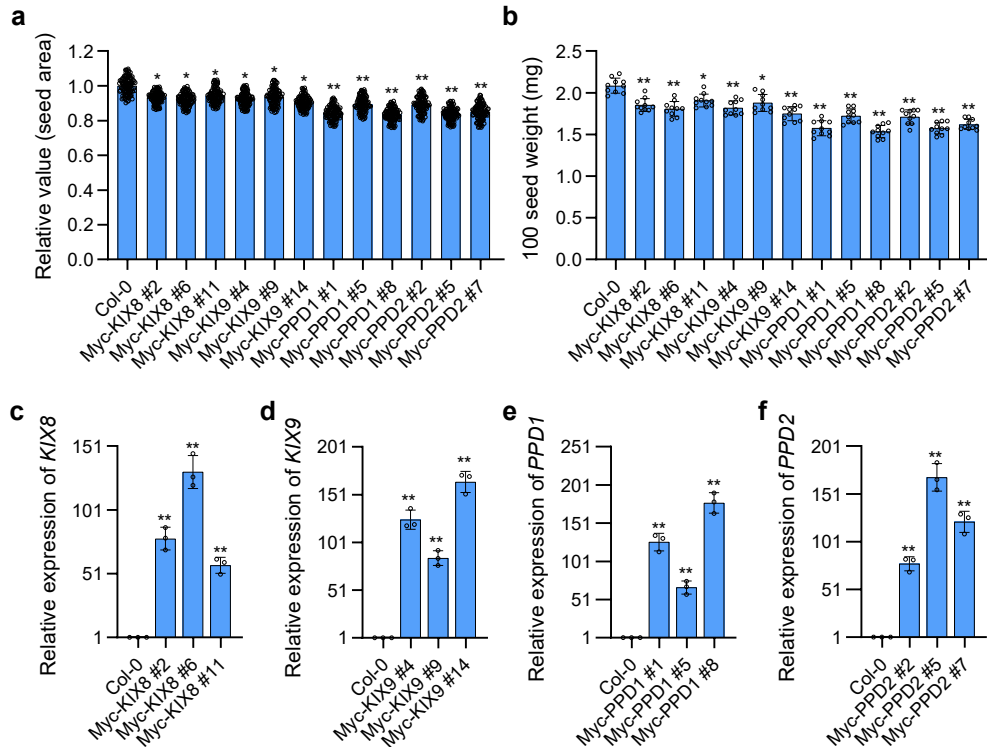

**Supplementary Fig. 9** The seed phenotype of the plants with overexpression of *KIX8*, *KIX9*, *PPD1*, and *PPD2*. **a-b** Seed area (**a**,  $n = 100$ ), and 100 seed weight (**b**,  $n = 10$ ) of Col-0, 35S:*Myc-KIX8* (*Myc-KIX8* #2, #6, #11), 35S:*Myc-KIX9* (*Myc-KIX9* #4, #9, #14), 35S:*Myc-PPD1* (*Myc-PPD1* #1, #5, #8), and 35S:*Myc-PPD2* (*Myc-PPD2* #2, #5, #7) plants. **c** The relative expression levels of *KIX8* in the 2 DAF (days after flowering) siliques of Col-0, and 35S:*Myc-KIX8* (*Myc-KIX8* #2, #6, #11) ( $n = 3$ ). **d** The relative expression levels of *KIX9* in the 2 DAF siliques of Col-0, and 35S:*Myc-KIX9* (*Myc-KIX9* #4, #9, #14). **e** The relative expression levels of *PPD1* in the 2 DAF siliques of Col-0, and 35S:*Myc-PPD1* (*Myc-PPD1* #1, #5, #8) ( $n = 3$ ). **f** The relative expression levels of *PPD2* in the 2 DAF siliques of Col-0, and 35S:*Myc-PPD2* (*Myc-PPD2* #2, #5, #7) ( $n = 3$ ). Seeds from the third to seventh silique on the stem of six plants were used for analysis. Scale bars = 0.5 mm. Error bars represent  $\pm$ SE. \*, significant difference from the Col-0, one-way ANOVA  $P$ -values: \*  $P < 0.05$  and \*\*  $P < 0.01$ .

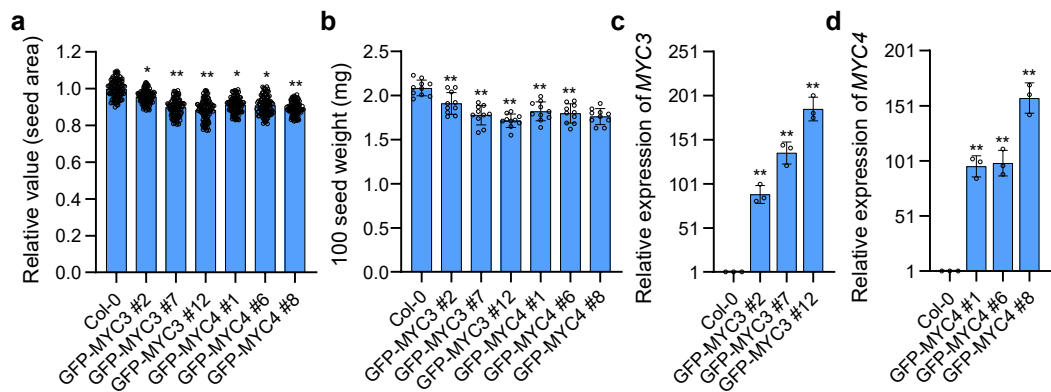

**Supplementary Fig. 10** The seed phenotype of the plants with overexpression of *MYC3* and *MYC4*. **a-b** Seed area (**a**,  $n = 100$ ), and 100 seed weight (**b**,  $n = 10$ ) of Col-0, 35S:*GFP-MYC3* (GFP-MYC3 #2, #7, #12), and 35S:*GFP-MYC4* (GFP-MYC4 #1, #6, #8) plants. **c** The relative expression levels of *MYC3* in the 2 DAF (days after flowering) siliques of Col-0, and 35S:*GFP-MYC3* (GFP-MYC3 #2, #7, #12) ( $n = 3$ ). **d** The relative expression levels of *MYC4* in the 2 DAF siliques of Col-0, and 35S:*GFP-MYC4* (GFP-MYC4 #1, #6, #8) ( $n = 3$ ). Seeds from the third to seventh silique on the stem of six plants were used for analysis. Scale bars = 0.5 mm. Error bars represent  $\pm$  SE. \*, significant difference from the Col-0, one-way ANOVA  $P$ -values: \*  $P < 0.05$  and \*\*  $P < 0.01$ .

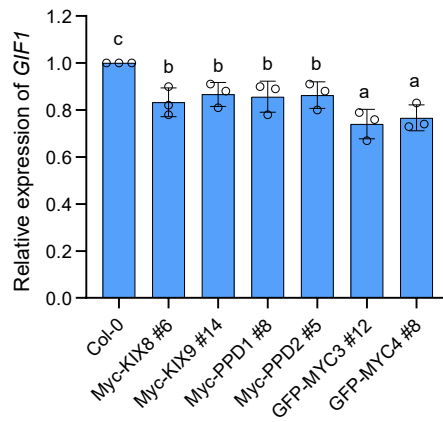

**Supplementary Fig. 11** The relative expression levels of *GIF1* in the 2 DAF siliques of *35S:Myc-KIX8* #6, *35S:Myc-KIX9* #14, *35S:Myc-PPD1* #8, *35S:Myc-PPD2* #5, *35S:GFP-MYC3* #12, and *35S:GFP-MYC4* #8 were detected by qPCR ( $n = 3$ ). Data was normalized with *ACTIN2*. Error bars represent  $\pm$ SE. Different lowercase letters above the columns indicate the significant difference among different groups, one-way ANOVA  $P$ -values:  $P < 0.05$ .

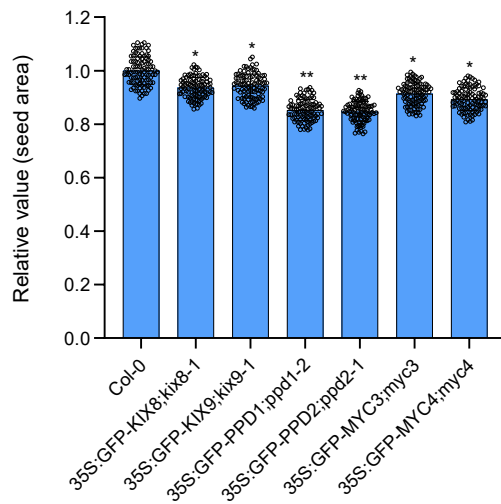

**Supplementary Fig. 12** The seed phenotype of 35S::GFP-KIX8;kix8-1, 35S::GFP-KIX9;kix9-1, 35S::GFP-PPD1;ppd1-2, 35S::GFP-PPD2;ppd2-1, 35S::GFP-MYC3;myc3, and 35S::GFP-MYC4;myc4 plants. Seed area (n = 100) of 35S::GFP-KIX8;kix8-1, 35S::GFP-KIX9;kix9-1, 35S::GFP-PPD1;ppd1-2, 35S::GFP-PPD2;ppd2-1, 35S::GFP-MYC3;myc3, and 35S::GFP-MYC4;myc4 plants. Seeds from the third to seventh siliques on the stem of six plants were used for analysis. Scale bars = 0.5 mm. Error bars represent  $\pm$ SE. \*, significant difference from the Col-0, one-way ANOVA *P*-values: \* *P* < 0.05 and \*\* *P* < 0.01.

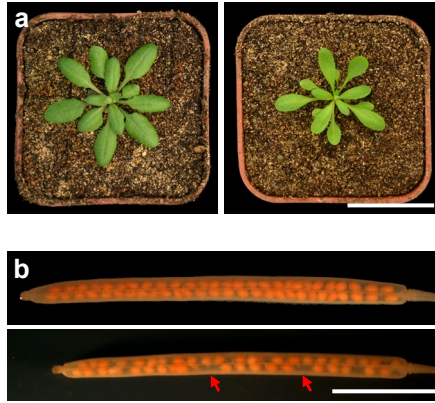

**Supplementary Fig. 13** The phenotypes of *gif1* plants. **a** The 25-day-old plants of Col-0 and *gif1* (from left to right). **b** The 10-DAP-old siliques of Col-0 and *gif1* (from up to down). Red arrows show the abortion sites. Scale bars, 4 cm (**a**) and 0.5 cm (**b**).

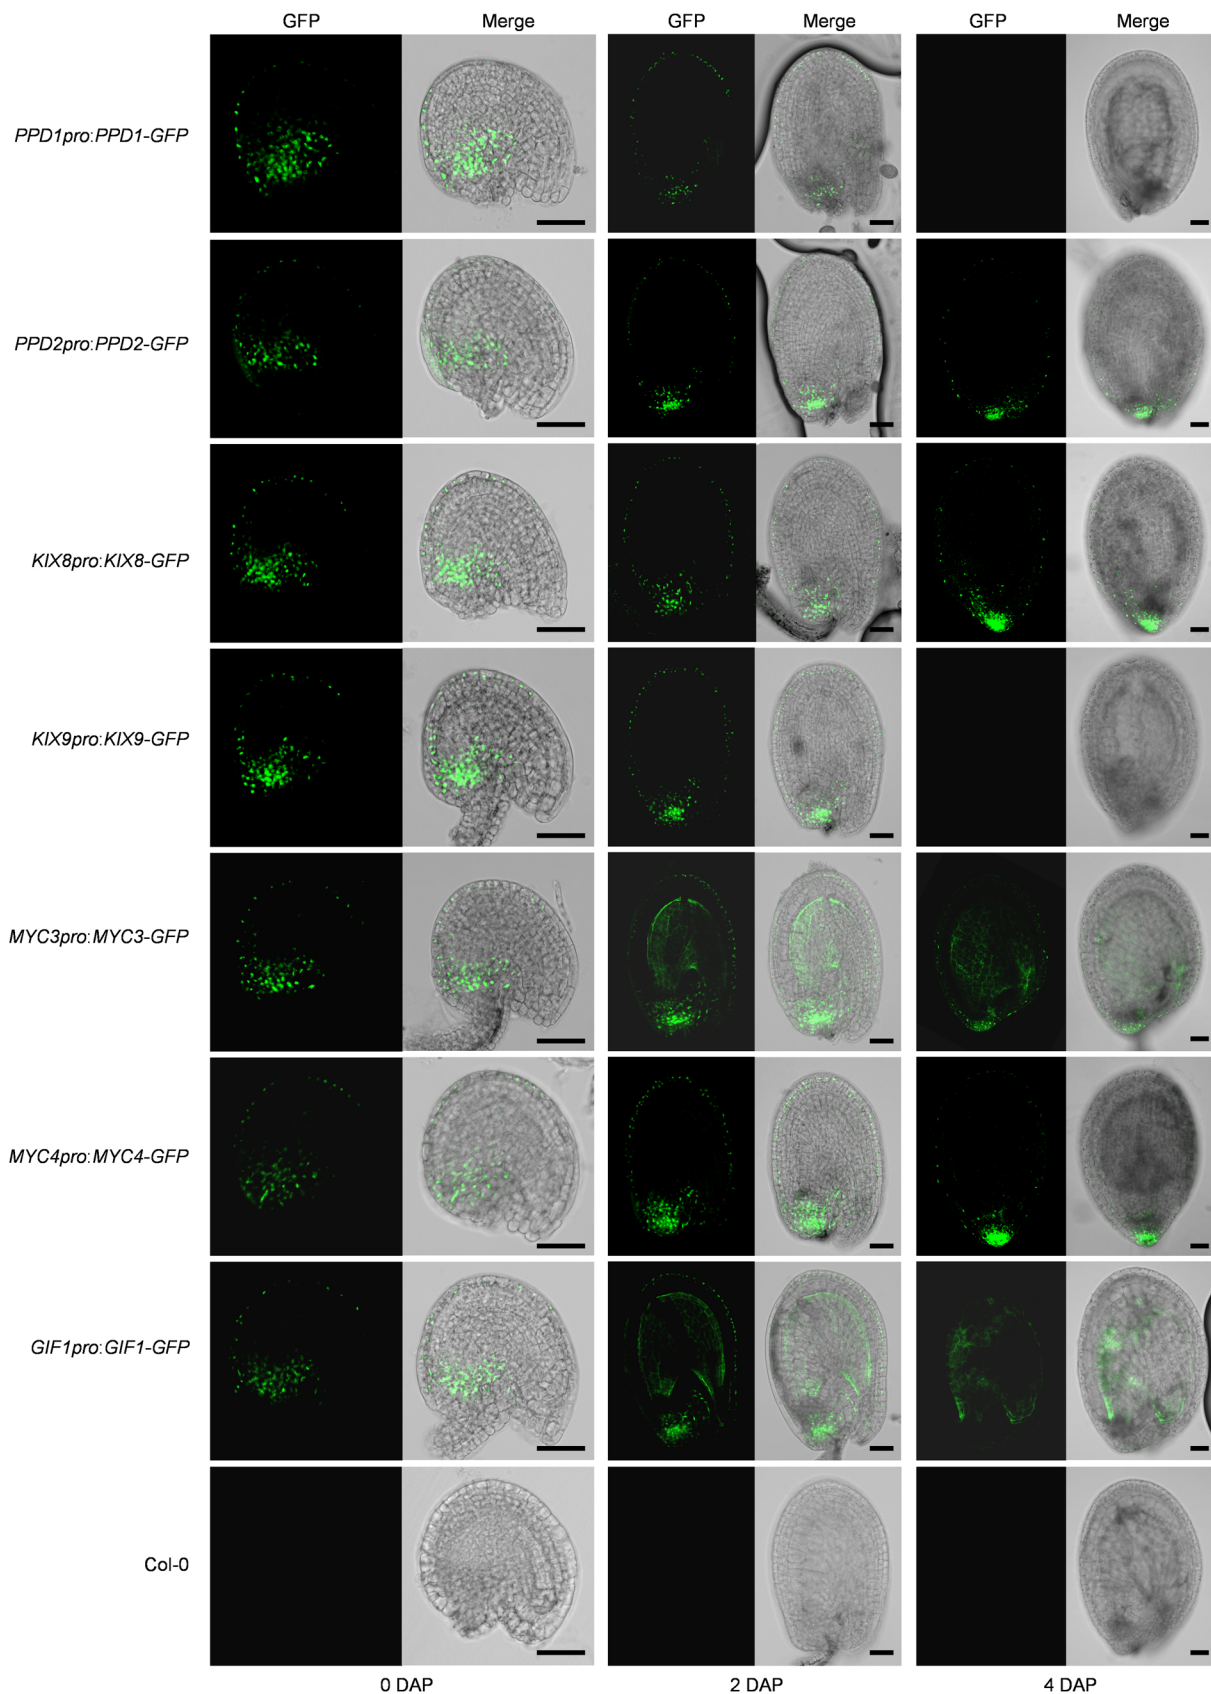

**Supplementary Fig. 14** Expression patterns of *KIX8*, *KIX9*, *PPD1*, *PPD2*, *MYC3*, *MYC4*, and *GIF1* in seeds during seed development. The promoters of *KIX8* (2,087 bp), *KIX9* (1,714 bp), *PPD1* (1,797 bp), *PPD2* (2,153 bp), *MYC3* (2,180 bp), *MYC4* (2,132 bp), and *GIF1* (2,337 bp) and their CDSs were cloned into the *pMDC107-GFP* vector to generate *KIX8pro:KIX8-GFP*, *KIX9pro:KIX9-GFP*, *PPD1pro:PPD1-GFP*, *PPD2pro:PPD2-GFP*, *MYC3pro:MYC3-GFP*, *MYC4pro:MYC4-GFP*, and *GIF1pro:GIF1-GFP* constructs, respectively. GFP fluorescence was observed by the confocal microscopy. DAP, days after pollination. Scale bars = 50  $\mu$ m.

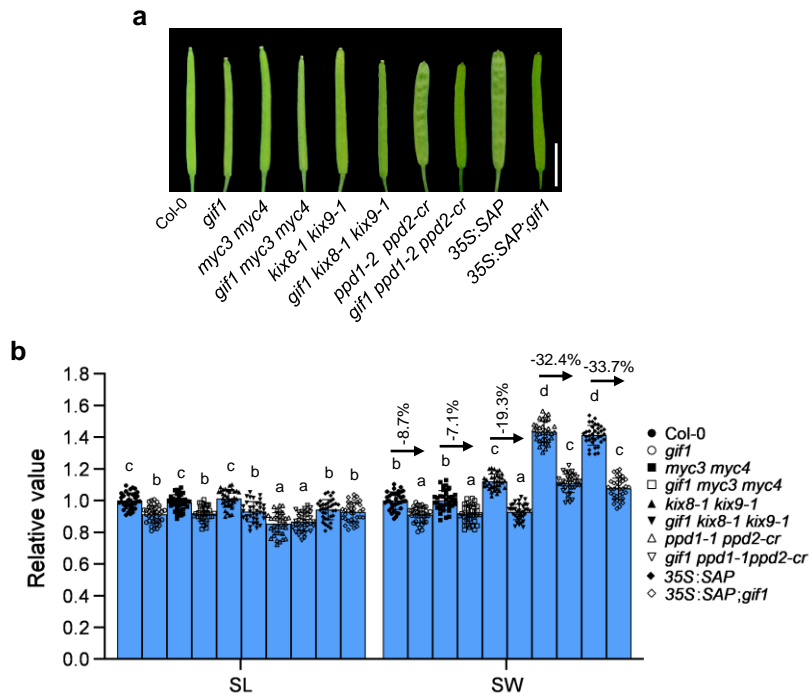

**Supplementary Fig. 15** The siliques (a) and siliques length (SL) and siliques width (SW) (b) of Col-0, *gif1*, *myc3 myc4*, *gif1 myc3 myc4*, *kix8-1 kix9-1*, *gif1 kix8-1 kix9-1*, *ppd1-2 ppd2-cr*, *gif1 ppd1-2 ppd2-cr*, *35S:SAP*, and *35S:SAP:gif1* plants (n = 35). Siliques from the fourth siliques on the stem of plants were used for analysis. Scale bar = 0.5 cm. Error bars represent  $\pm$ SE. Different lowercase letters above the columns indicate the significant difference among different groups, one-way ANOVA *P*-values: *P* < 0.05.



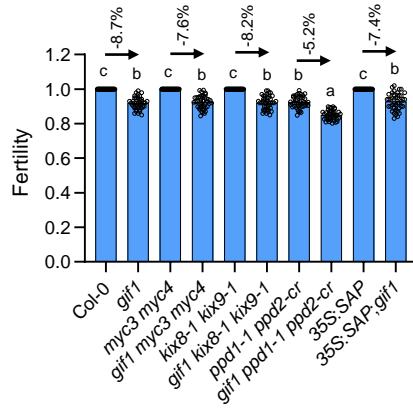

**Supplementary Fig. 16** The fertility of Col-0, *gif1*, *myc3 myc4*, *gif1 myc3 myc4*, *kix8-1 kix9-1*, *gif1 kix8-1 kix9-1*, *ppd1-2 ppd2-cr*, *gif1 ppd1-2 ppd2-cr*, *35S:SAP*, and *35S:SAP;gif1* plants (n = 40). Error bars represent  $\pm$ SE. Different lowercase letters above the columns indicate the significant difference among different groups, one-way ANOVA *P*-values: *P* < 0.05.

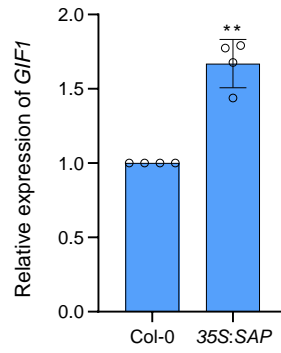

**Supplementary Fig. 17** The *GIF1* expression in the 35S:SAP plants. The relative expression levels of *GIF1* in the 3 DAP siliques of Col-0, and 35S:SAP were detected by qPCR (n = 4). Data are normalized with *ACTIN2*. Error bars represent  $\pm$ SE. \*, significant difference from the Col-0, one-way ANOVA *P*-values: \*\* *P* < 0.01.

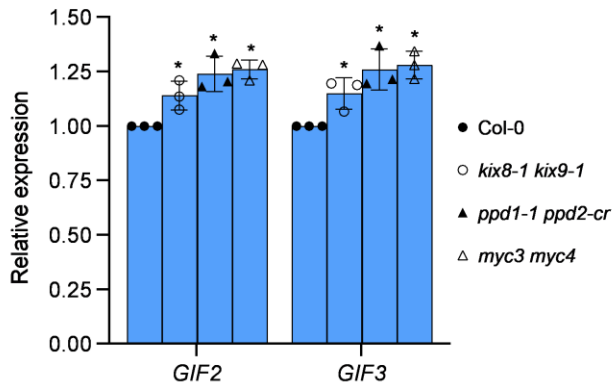

**Supplementary Fig. 18** The expression levels of *GIF2* and *GIF3* in the Col-0, *kix8-1 kix9-1*, *ppd1-2 ppd2-cr*, and *myc3 myc4*. The expression levels of *GIF2* and *GIF3* in 3 DAP siliques of the Col-0, *kix8-1 kix9-1*, *ppd1-2 ppd2-cr*, and *myc3 myc4* were detected by qPCR (n = 3). Data was normalized with *ACTIN2*. Error bars represent  $\pm$ SE. \*, significant difference from the Col-0, one-way ANOVA P-values: \* P < 0.05.

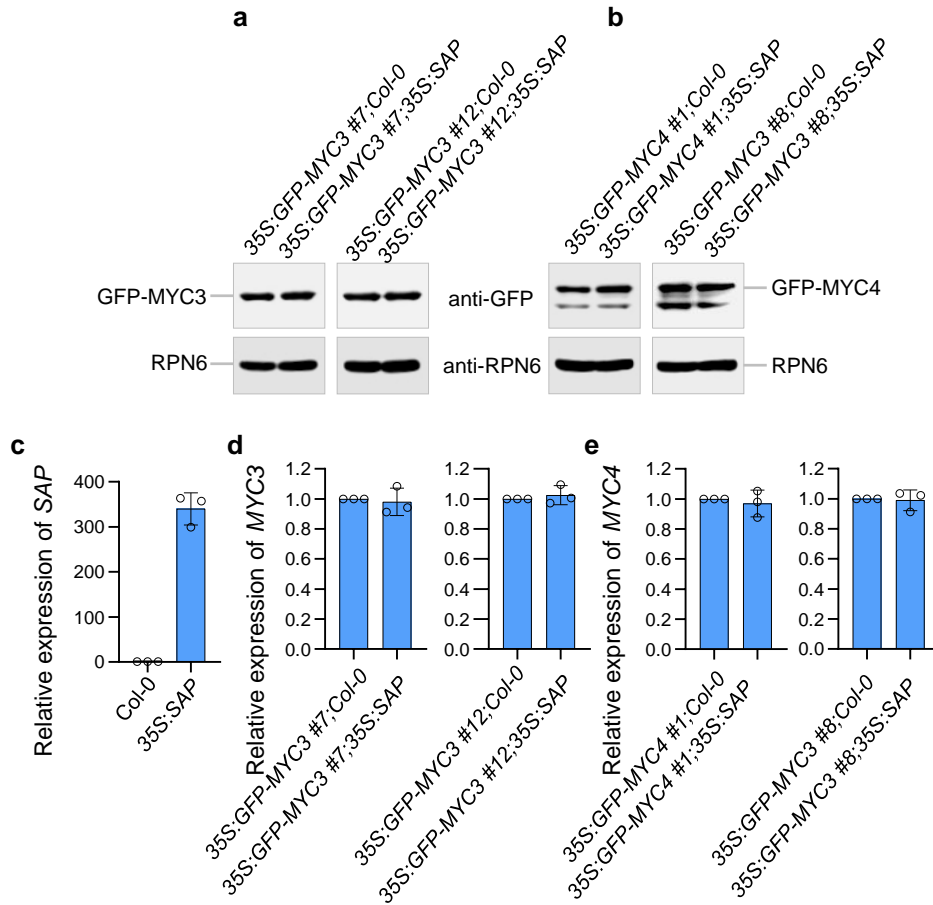

**Supplementary Fig. 19** The stabilities of MYC3 and MYC4 are not regulated by SAP. **a-b** The amounts of GFP-MYC3 and GFP-MYC4 in the plants with SAP overexpression. *35S::GFP-MYC3* (#7 and #12) or *35S::GFP-MYC4* (#1 and #8) transgenic line was crossed with Col-0 and *35S::SAP* plants to generate *35S::GFP-MYC3* #7;Col-0, *35S::GFP-MYC3* #7;*35S::SAP*, *35S::GFP-MYC3* #12;Col-0, *35S::GFP-MYC3* #12;*35S::SAP*, *35S::GFP-MYC4* #1;Col-0, *35S::GFP-MYC4* #1;*35S::SAP*, *35S::GFP-MYC3* #8;Col-0, and *35S::GFP-MYC3* #8;*35S::SAP*, respectively. 10-day-old F<sub>1</sub> seedlings were used for analysis with anti-GFP and anti-RPN6 antibodies. RPN6 was used as loading controls. **c** The relative expression of *SAP* in *35S::SAP* seedlings (n = 3). 10-day-old seedlings were used for analysis by qPCR. Data was normalized with *ACTIN2*. Error bars represent  $\pm$ SE. **d** The relative expression of *MYC3* in *35S::GFP-MYC3* #7;Col-0, *35S::GFP-MYC3* #7;*35S::SAP*, *35S::GFP-MYC3* #12;Col-0, and *35S::GFP-MYC3* #12;*35S::SAP* seedlings (n = 3). 10-day-old F<sub>1</sub> seedlings were used for analysis by qPCR. Data was normalized with *ACTIN2*. Error bars represent  $\pm$ SE. **e** The relative expression of *MYC4* in *35S::GFP-MYC4* #1;Col-0, *35S::GFP-MYC4* #1;*35S::SAP*, *35S::GFP-MYC3* #8;Col-0, and *35S::GFP-MYC3* #8;*35S::SAP* seedlings (n = 3). 10-day-old F<sub>1</sub> seedlings were used for analysis by qPCR. Data was normalized with *ACTIN2*. Error bars represent  $\pm$ SE.

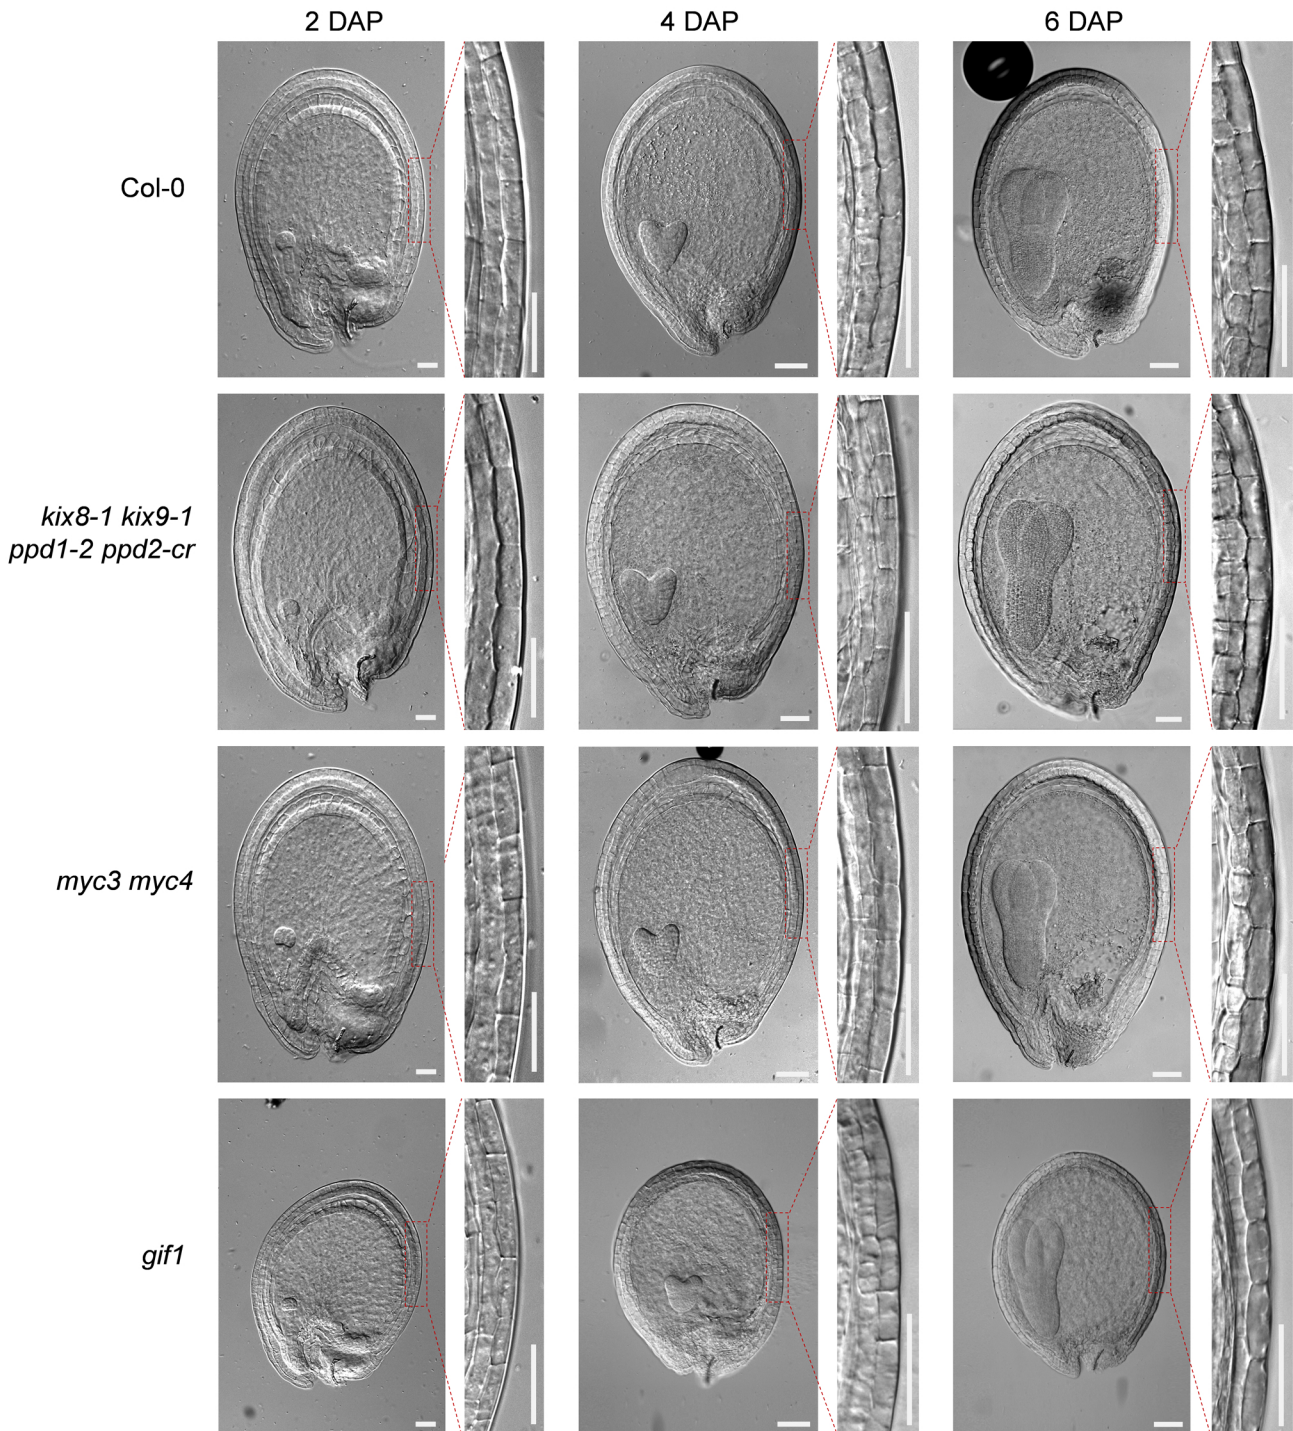

**Supplementary Fig. 20** The seeds of Col-0, *kix8-1 kix9-1 ppd1-2 ppd2-cr*, *myc3 myc4*, and *gif1* at 2, 4 and 6 DAP. The seeds were obtained under 20x magnification by the differential interference contrast microscope. The outer integument cells were obtained under 40x magnification by the differential interference contrast microscope. Scale bars, 25  $\mu\text{m}$  (images at 2 DAP) and 50  $\mu\text{m}$  (images at 4 and 6 DAP). Supports for Fig. 1i-l, Fig. 3i-l and Fig. 5i-l.

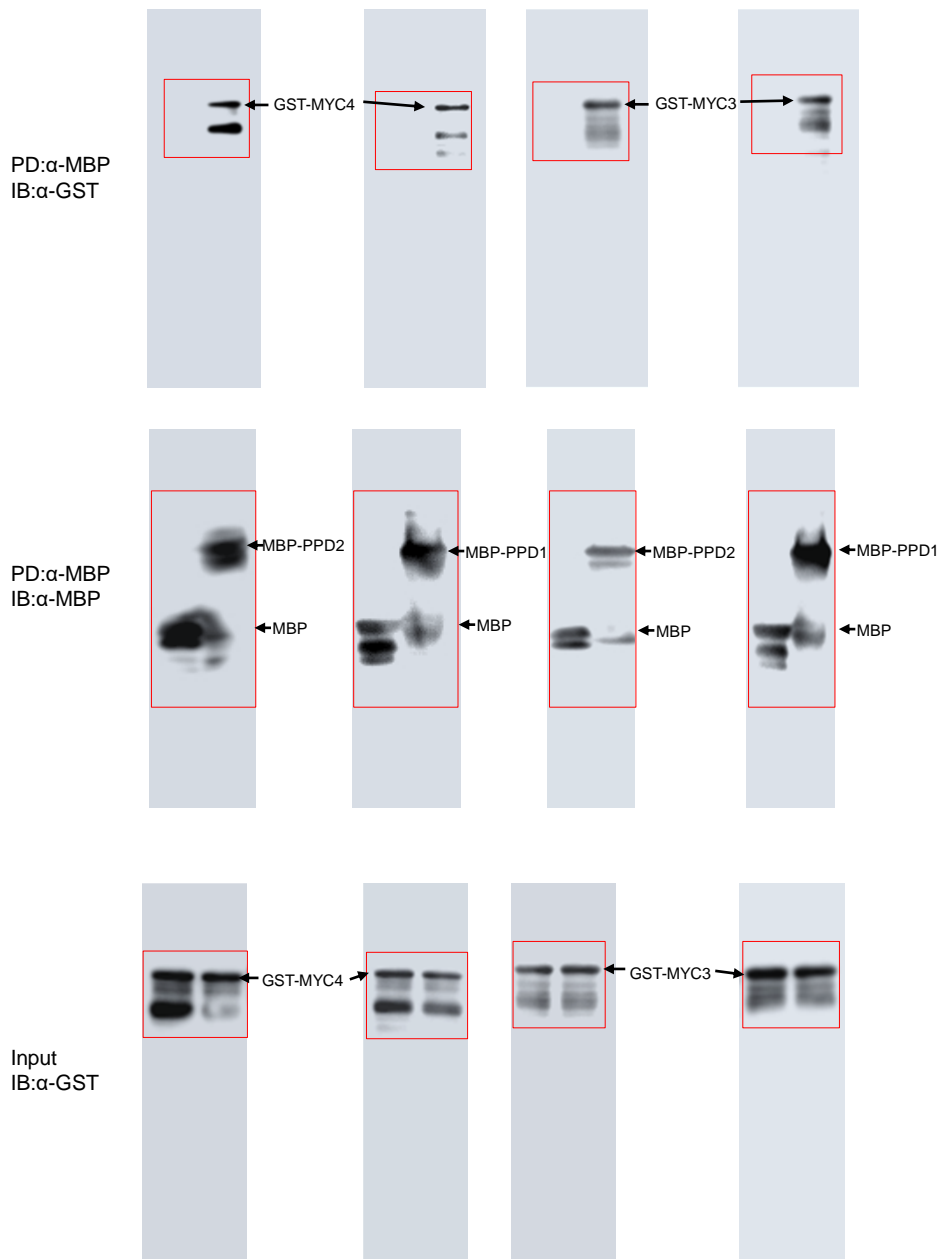

**Supplementary Fig. 21** Original images of Fig. 2c.

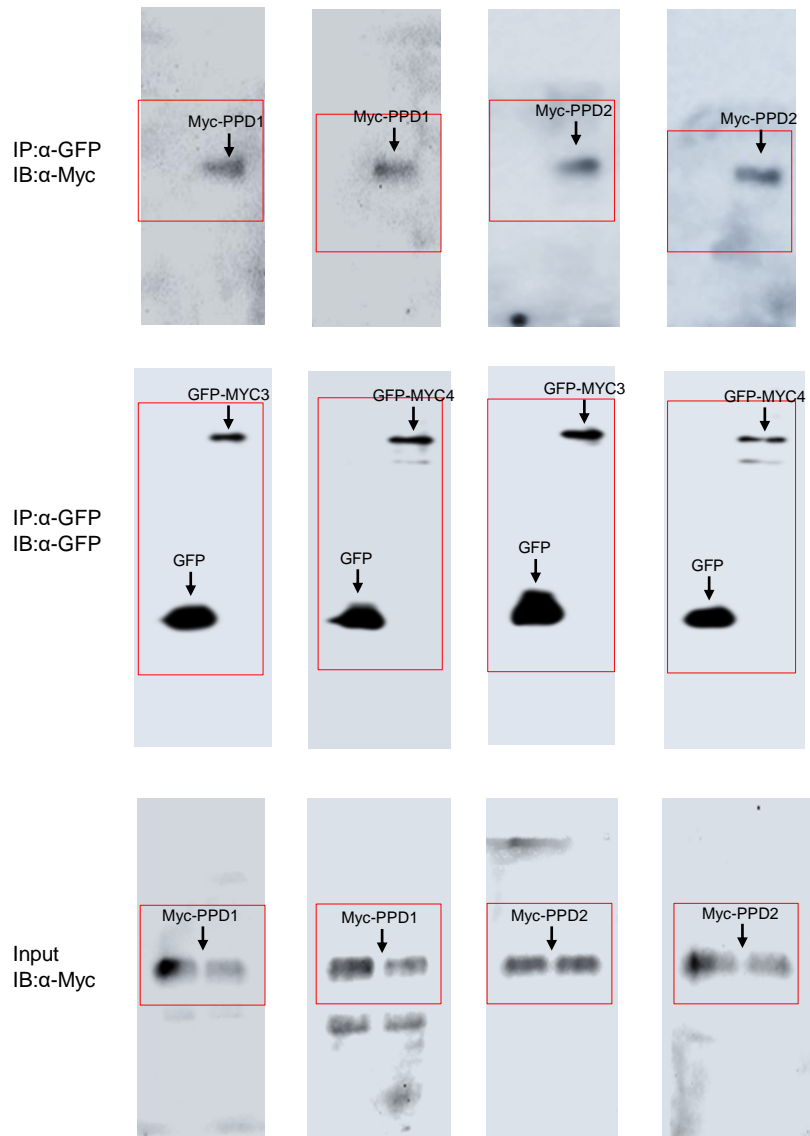

**Supplementary Fig. 22** Original images of Fig. 2d.

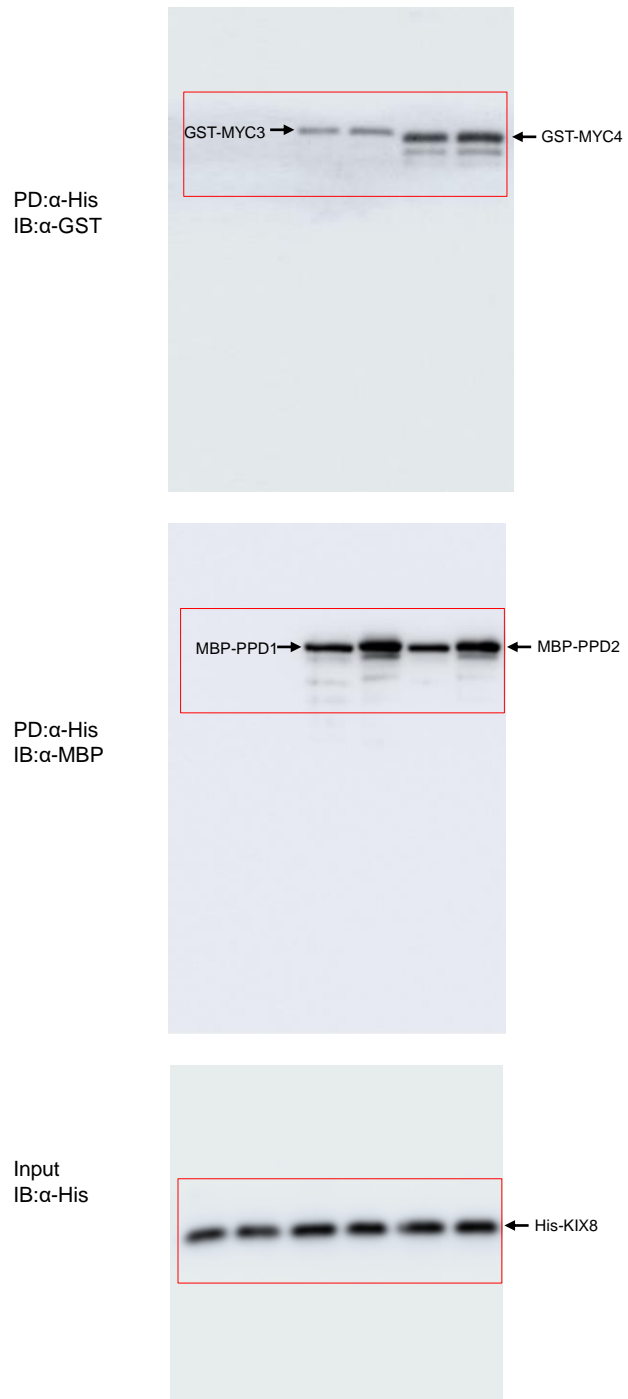

**Supplementary Fig. 23** Original images of Fig. 2e.



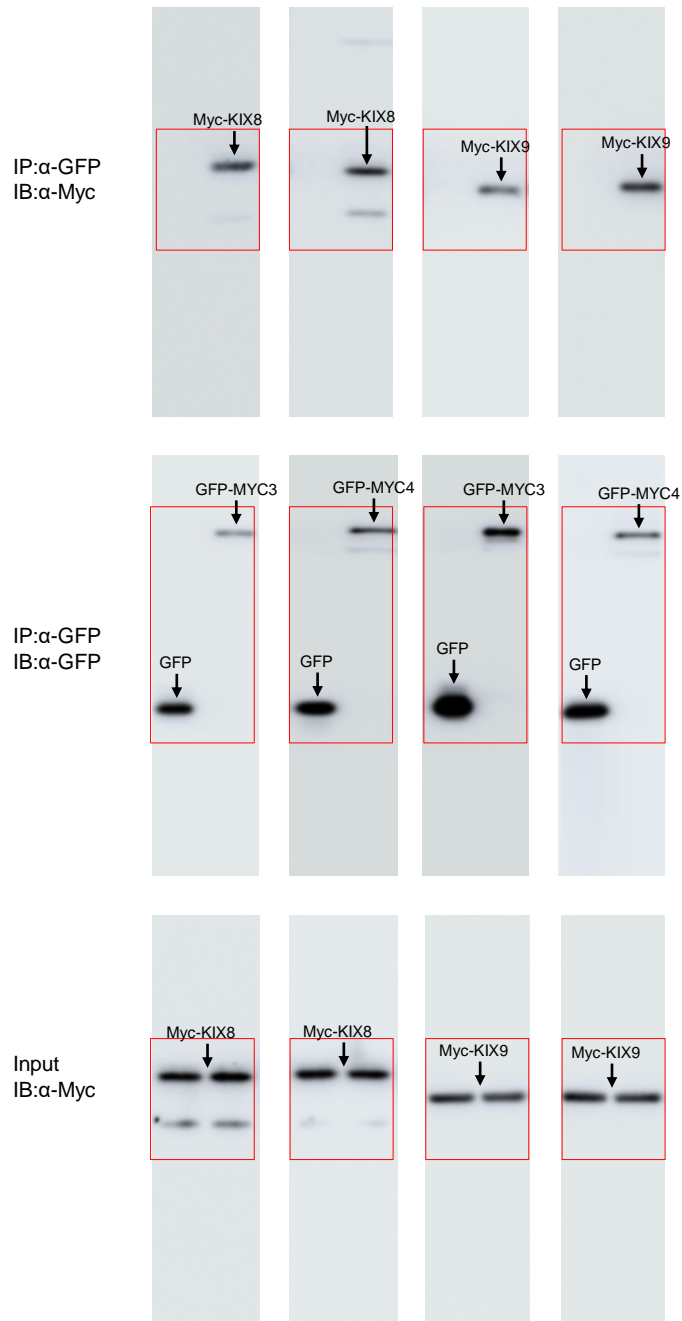

**Supplementary Fig. 24** Original images of Fig. 2f.

**Supplementary Table 1 | List of primers used in this study**

| <b>Primer Name</b> | <b>Sequence</b>                                        | <b>Purpose</b>    |
|--------------------|--------------------------------------------------------|-------------------|
| ppd1-2F            | ACGAGAAGAATTCGCCTTCTC                                  | genotype analysis |
| ppd1-2R            | TGGCCACAAGACGACTATTTTC                                 | genotype analysis |
| ppd2-1F            | CGCTCTCAGGTGTTTTAAAGC                                  | genotype analysis |
| ppd2-1R            | GAATCATGGTTTTGATGGTGG                                  | genotype analysis |
| kix8-1F            | TTGGTGCCACTTAGACCAAAC                                  | genotype analysis |
| kix8-1R            | TGAAAATCTGGCGAATAATCG                                  | genotype analysis |
| kix9-1F            | ATTTGACGCAAGTTATCCACG                                  | genotype analysis |
| kix9-1R            | CTTGAAGCTCTCCTTGGTGTG                                  | genotype analysis |
| gif1-F             | AGGGTCCAGTTGTGTTTTGAGTTC                               | genotype analysis |
| gif1-R             | GCTCGAGTCCCTGTGCCACACTCTT                              | genotype analysis |
| myc3-F             | AGGCAAAACCCATTTACAACC                                  | genotype analysis |
| myc3-R             | TGAAGCAGAGAGGCAGAGAAG                                  | genotype analysis |
| myc4-F             | CTCCTTGACAAATTTGATCCG                                  | genotype analysis |
| myc4-R             | CGCTACACACACCATTGTTTG                                  | genotype analysis |
| LBa1               | TGGTTCACGTAGTGGGCCATCG                                 | genotype analysis |
| 8474               | ATAATAACGCTGCGGACATCTACATT                             | genotype analysis |
| LB1                | CAGAAATGGATAAATAGCCTTG                                 | genotype analysis |
| LBb1.3             | ATTTTGCCGATTTCCGGAAC                                   | genotype analysis |
| 0849               | ATTGACCATCATACTATTGC                                   | genotype analysis |
| PPD1-CRIJD-F       | GGATTCCGGTGAAGAGGAGG                                   | genotype analysis |
| PPD1-CRIJD-R       | TCAATCAACGTTGTTGTGAC                                   | genotype analysis |
| PPD2-CRIJD-F       | AATCTCTGTTTTCTTTCGTGTC                                 | genotype analysis |
| PPD2-CRIJD-R       | AGATAAACTTGCTGGATCGC                                   | genotype analysis |
| GIF1-QF            | CTACCCAGCAATGTTACCTC                                   | qPCR              |
| GIF1-QR            | ATTCGCTAAGCTTTCAGAGT                                   | qPCR              |
| GIF2-QF            | TACAGTTTGGTAGCCCACTCC                                  | qPCR              |
| GIF2-QR            | TGGTCTAATCCCATGTGTCC                                   | qPCR              |
| GIF3-QF            | TTCCTTCATTTCCGCCAC                                     | qPCR              |
| GIF3-QR            | CTGATTTCCAAGATCGCCAT                                   | qPCR              |
| V159-MYC3F         | GGGACGAGCTCGGTACCCGGGGATCCATGAACGGCACAACA<br>TCATCAATC | <i>MYC3-nLUC</i>  |
| V159-MYC3R         | GGGACGCGTACGAGATCTGGTCGACATAGTTTTCTCCGACTT<br>TC       | <i>MYC3-nLUC</i>  |
| V45-MYC3F          | GGTCCGCGTGGATCCCGGAATTCATGAACGGCACAACAT<br>CATCAATC    | <i>GST-MYC3</i>   |
| V45-MYC3R          | GCCGCTCGAGTCGACCCGGAATTCTCAATAGTTTTCTCCGA<br>CTTTC     | <i>GST-MYC3</i>   |
| YC-MYC3F           | CTTACGATGTTCTGACTATGCGATGAACGGCACAACATCAT<br>CAATC     | <i>cYFP-MYC3</i>  |
| YC-MYC3R           | AACATATCCAGTCACTATGGTCAATAGTTTTCTCCGACTTTC             | <i>cYFP-MYC3</i>  |
|                    |                                                        |                   |

|            |                                                             |                  |
|------------|-------------------------------------------------------------|------------------|
| GW-MYC3F   | GGGGACAAGTTTGTACAAAAAAGCAGGCTTCATGAACGGCA<br>CAACATCATCAATC | <i>GFP-MYC3</i>  |
| GW-MYC3R   | GGGGACCACTTTGTACAAGAAAGCTGGGTCTCAATAGTTTTC<br>TCCGACTTTC    | <i>GFP-MYC3</i>  |
| GW-MYC4F   | GGGGACAAGTTTGTACAAAAAAGCAGGCTTCATGTCTCCGAC<br>GAATGTTCAAG   | <i>GFP-MYC4</i>  |
| GW-MYC4R   | GGGGACCACTTTGTACAAGAAAGCTGGGTCTCATGGACATTC<br>TCCAACCTTTC   | <i>GFP-MYC4</i>  |
| V159-MYC4F | GGGACGAGCTCGGTACCCGGGGATCCATGTCTCCGACGAAT<br>GTTCAAG        | <i>MYC4-nLUC</i> |
| V159-MYC4R | GGGACGCGTACGAGATCTGGTCGACTGGACATTCTCCAAC<br>TTC             | <i>MYC4-nLUC</i> |
| V45-MYC4F  | GGTTCGCGGTGGATCCCCGGAATTCATGTCTCCGACGAATG<br>TTC            | <i>GST-MYC4</i>  |
| V45-MYC4R  | GCCGCTCGAGTCGACCCGGAATTCATGGACATTCTCCA<br>ACTTTC            | <i>GST-MYC4</i>  |
| YC-MYC4F   | CTTACGATGTTCTGACTATGCGATGTCTCCGACGAATGTTCA<br>AG            | <i>cYFP-MYC4</i> |
| YC-MYC4R   | AACATATCCAGTCACTATGGTCATGGACATTCTCCAACCTTTC                 | <i>cYFP-MYC4</i> |
| V158-PPD1F | GTCCCGGGGCGGTACCCGGGGATCCATGGATGTCGGAGTTT<br>CACC           | <i>cLUC-PPD1</i> |
| V158-PPD1R | TCCTTGTAGTCCATTTGTTGGATCCTTAAATGCCTTCACTGTT<br>TAGA         | <i>cLUC-PPD1</i> |
| V158-PPD2F | GTCCCGGGGCGGTACCCGGGGATCCATGGATGTAGGAGTTA<br>CTACGG         | <i>cLUC-PPD2</i> |
| V158-PPD2R | TCCTTGTAGTCCATTTGTTGGATCCTTAAATTATCTTCGCTGTTT<br>AGATCA     | <i>cLUC-PPD2</i> |
| MYC3-F2    | CTAGAGGATCCCCGGGTACCATGAACGGCACAACATCATC                    | <i>MYC3-CFP</i>  |
| MYC3-R2    | GCGGCCGCTCTAGAAGTAGTATAGTTTCTCCGACTTTCG                     | <i>MYC3-CFP</i>  |
| MYC4-F2    | CTAGAGGATCCCCGGGTACCATGTCTCCGACGAATGTTTC                    | <i>MYC4-CFP</i>  |
| MYC4-R2    | GCGGCCGCTCTAGAAGTAGTTGGACATTCTCCAACCTTTC                    | <i>MYC4-CFP</i>  |
| PPD1-F2    | CTAGAGGATCCCCGGGTACCATGGATGTCGGAGTTTCACC                    | <i>PPD1-YFP</i>  |
| PPD1-R2    | GCGGCCGCTCTAGAAGTAGTAATGCCTTCACTGTTTAGATC                   | <i>PPD1-YFP</i>  |
| PPD2-F2    | CTAGAGGATCCCCGGGTACC ATGGATGTAGGAGTTACTAC                   | <i>PPD2-YFP</i>  |
| PPD2-R2    | GCGGCCGCTCTAGAAGTAGTATTATCTTCGCTGTTTAGATC                   | <i>PPD2-YFP</i>  |
| DEL1-F2    | CTAGAGGATCCCCGGGTACCATGTCAGATCTATCGCCAG                     | <i>DEL1-YFP</i>  |
| DEL1-R2    | GCGGCCGCTCTAGAAGTAGTACGGTGTGTGATGTATTAG                     | <i>DEL1-YFP</i>  |
| V47-PPD1F  | GGGAAGGATTTTCAAGAAATTCGGATCCATGGATGTCGGAGTTTC<br>ACC        | <i>MBP-PPD1</i>  |
| V47-PPD1R  | CCTGCAGGTGCGACTCTAGAGGATCCTTAAATGCCTTCACTGT<br>TTAGAT       | <i>MBP-PPD1</i>  |
| V47-PPD2F  | GGGAAGGATTTTCAAGAAATTCGGATCCATGGATGTAGGAGTTAC<br>TACGG      | <i>MBP-PPD2</i>  |

|           |                                                            |                         |
|-----------|------------------------------------------------------------|-------------------------|
| V47-PPD2R | CCTGCAGGTCGACTCTAGAGGATCCTTAATTATCTTCGCTGTT<br>TAGATC      | <i>MBP-PPD2</i>         |
| YN-PPD1F  | GAGGAAGAGTATATGCCTATGAAATGGATGTCGGAGTTTCA<br>CC            | <i>nYFP-PPD1</i>        |
| YN-PPD1R  | AACATATCCAGTCACTATGGTAAATGCCTTCACTGTTTAGAT                 | <i>nYFP-PPD1</i>        |
| YN-PPD2F  | GAGGAAGAGTATATGCCTATGAAATGGATGTAGGAGTTACTA<br>CGG          | <i>nYFP-PPD2</i>        |
| YN-PPD2R  | AACATATCCAGTCACTATGGTAAATATCTTCGCTGTTTAGATC                | <i>nYFP-PPD2</i>        |
| V6-PPD1F  | GAGGACTTGAATTCGGTACCCATGGATGTCGGAGTTTCACC                  | <i>Myc-PPD1</i>         |
| V6-PPD1R  | CGATTTCGAACCCGGGTACCTTAAATGCCTTCACTGTTTAG                  | <i>Myc-PPD1</i>         |
| V6-PPD2F  | GAGGACTTGAATTCGGTACCCATGGATGTAGGAGTTACTACG                 | <i>Myc-PPD2</i>         |
| V6-PPD2R  | CGATTTCGAACCCGGGTACCTTAAATATCTTCGCTGTTTAGA                 | <i>Myc-PPD2</i>         |
| V6-KIX8F  | GAGGACTTGAATTCGGTACCCATGCCGAGGCCAGGACCAAG                  | <i>Myc-KIX8</i>         |
| V6-KIX8R  | CGATTTCGAACCCGGGTACCCTAAAGGAAGTCTCCACACA                   | <i>Myc-KIX8</i>         |
| V6-KIX9F  | GAGGACTTGAATTCGGTACCCATGCCGAGGCCAGGGCCAAG                  | <i>Myc-KIX9</i>         |
| V6-KIX9R  | CGATTTCGAACCCGGGTACCTCAGTTGTTATTGTTGCTGCT                  | <i>Myc-KIX9</i>         |
| V6-MYC3F  | GAGGACTTGAATTCGGTACCCATGAACGGCACAACATCATC                  | <i>Myc-MYC3</i>         |
| V6-MYC3R  | CGATTTCGAACCCGGGTACCTCAATAGTTTTCTCCGACT                    | <i>Myc-MYC3</i>         |
| V6-MYC4F  | GAGGACTTGAATTCGGTACCCATGTCTCCGACGAATGTTTC                  | <i>Myc-MYC4</i>         |
| V6-MYC4R  | CGATTTCGAACCCGGGTACCTCATGGACATTCTCCAAC                     | <i>Myc-MYC4</i>         |
| V6-TPLF   | GAGGACTTGAATTCGGTACCCATGTCTTCTTAGTAGAG                     | <i>Myc-TPL</i>          |
| V6-TPLR   | CGATTTCGAACCCGGGTACCTCATCTGAGGCTGATCAG                     | <i>Myc-TPL</i>          |
| GIF1pro-F | CGCGGTGGAGATCGAATCCCATGGAGAGGATTCAACATCA<br>ACCTCAC        | <i>GIF1pro:LUC</i>      |
| GIF1pro-R | TTTATGTTTTTGGCGTCTCCATGGGTGCTGTTGCATTTCTTT<br>TGC          | <i>GIF1pro:LUC</i>      |
| V46-KIX8F | AATGGGTGCGGATCCGAATTCATGCCGAGGCCAGGACCAA<br>GAC            | <i>His-KIX8</i>         |
| V46-KIX8R | TTGTGACGAGCTCGAATTCATGCCGAGGCCAGGACCAA<br>AC               | <i>His-KIX8</i>         |
| V46-KIX9F | AATGGGTGCGGATCCGAATTCATGCCGAGGCCAGGGCCA<br>GAC             | <i>His-KIX9</i>         |
| V46-KIX9R | TTGTGACGAGCTCGAATTCAGTTGTTATTGTTGCTGCT                     | <i>His-KIX9</i>         |
| GW-GIF1F  | GGGGACAAGTTTGTACAAAAAAGCAGGCTTC<br>ATGCAACAGCACCTGATGCAGAT | <i>35S:GIF1</i>         |
| GW-GIF1R  | GGGGACCACTTTGTACAAAGAAAGCTGGGTC<br>TCAATCCCATCATCTGATG     | <i>35S:GIF1</i>         |
| KIX8pro-F | TAGAGGATCCCCGGGTACGTAATACAGCAACCTCTCCAC                    | <i>KIX8pro:KIX8-GFP</i> |
| KIX8pro-R | CTTGGTCCTGGCCTCGGCAT                                       | <i>KIX8pro:KIX8-GFP</i> |
| KIX8-F    | ATGCCGAGGCCAGGACCAAAG                                      | <i>KIX8pro:KIX8-GFP</i> |
| KIX8-R    | GTACCGGTAGAAAAAATGAGAAGGAAGTCTCCACACAAAG                   | <i>KIX8pro:KIX8-GFP</i> |
| KIX9pro-F | TAGAGGATCCCCGGGTACTTCTGTTCTCTCGAGTTGTC                     | <i>KIX9pro:KIX9-GFP</i> |
| KIX9pro-R | CTTGGCCCTGGCCTCGGCAT                                       | <i>KIX9pro:KIX9-GFP</i> |

|              |                                            |                         |
|--------------|--------------------------------------------|-------------------------|
| KIX9-F       | ATGCCGAGGCCAGGGCCAAG                       | <i>KIX9pro:KIX9-GFP</i> |
| KIX9-R       | GTACCGGTAGAAAAAATGAGGTTGTTATTGTTGCTGCTTATC | <i>KIX9pro:KIX9-GFP</i> |
| PPD1pro-F    | TAGAGGATCCCCGGGTACGGAGACTTGATGCTGATAAC     | <i>PPD1pro:PPD1-GFP</i> |
| PPD1pro-R    | GGTGAAACTCCGACATCCAT                       | <i>PPD1pro:PPD1-GFP</i> |
| PPD1-F       | ATGGATGTCGGAGTTTCACC                       | <i>PPD1pro:PPD1-GFP</i> |
| PPD1-R       | GTACCGGTAGAAAAAATGAGAATGCCTTCACTGTTTAGATC  | <i>PPD1pro:PPD1-GFP</i> |
| PPD2pro-F    | TAGAGGATCCCCGGGTACGATCCATTTCTTCGATAACGAC   | <i>PPD2pro:PPD2-GFP</i> |
| PPD2pro-R    | CGTAGTAACTCCTACATCCAT                      | <i>PPD2pro:PPD2-GFP</i> |
| PPD2-F       | ATGGATGTAGGAGTTACTACG                      | <i>PPD2pro:PPD2-GFP</i> |
| PPD2-R       | GTACCGGTAGAAAAAATGAGATTATCTTCGCTGTTTAGATC  | <i>PPD2pro:PPD2-GFP</i> |
| MYC3pro-F    | TAGAGGATCCCCGGGTACAAGTCACACAATTCTAAATC     | <i>MYC3pro:MYC3-GFP</i> |
| MYC3pro-R    | GATGATGTTGTGCCGTTTCAT                      | <i>MYC3pro:MYC3-GFP</i> |
| MYC3-F       | ATGAACGGCACAACATCATC                       | <i>MYC3pro:MYC3-GFP</i> |
| MYC3-R       | GTACCGGTAGAAAAAATGAGATAGTTTTCTCCGACTTTTCG  | <i>MYC3pro:MYC3-GFP</i> |
| MYC4pro-F    | TAGAGGATCCCCGGGTACCAACGTAATGCTACACATTAG    | <i>MYC4pro:MYC4-GFP</i> |
| MYC4pro-R    | CTTGAACATTTCGTCGGAGACAT                    | <i>MYC4pro:MYC4-GFP</i> |
| MYC4-F       | ATGTCTCCGACGAATGTTCAAG                     | <i>MYC4pro:MYC4-GFP</i> |
| MYC4-R       | GTACCGGTAGAAAAAATGAGTGGACATTCTCCAACTTTCTC  | <i>MYC4pro:MYC4-GFP</i> |
| GIF1pro-F    | TAGAGGATCCCCGGGTACAGAGGATTCAACATCAACCTCAC  | <i>GIF1pro:GIF1-GFP</i> |
| GIF1pro-R    | CTGCATCAGGTGCTGTTGCAT                      | <i>GIF1pro:GIF1-GFP</i> |
| GIF1-F       | ATGCAACAGCACCTGATGCAG                      | <i>GIF1pro:GIF1-GFP</i> |
| GIF1-R       | GTACCGGTAGAAAAAATGAGATTCCCATCATCTGATGATTC  | <i>GIF1pro:GIF1-GFP</i> |
| ChIPF1F      | TGTGTACATATTGATAAGTAG                      | ChIP-qPCR               |
| ChIPF1R      | CTTTCTGTCTCATCTATCTC                       | ChIP-qPCR               |
| ChIPF2F      | CCAAAACAAAATAAGACGAC                       | ChIP-qPCR               |
| ChIPF2R      | GGATTTTATAATAAAGTAATGC                     | ChIP-qPCR               |
| ChIPF3F      | AGATAACTATTGGTAAGCGTAAG                    | ChIP-qPCR               |
| ChIPF3R      | TTGTTTTAAAAGTAGCGCATG                      | ChIP-qPCR               |
| ChIPF4F      | GAATTGATCATTGTGAAGCG                       | ChIP-qPCR               |
| ChIPF4R      | CAATAGTGTCTATGCCATC                        | ChIP-qPCR               |
| Actin7-ChIPF | TGTTGGTCGTCCTAGGCAC                        | ChIP-qPCR               |
| Actin7-ChIPR | ATGCCATATCTTTTCCATGTC                      | ChIP-qPCR               |
